# Supplementary material for: Selenium Metabolism in Cancer Cells: The Combined Application of XAS and XFM Techniques to the Problem of Selenium Speciation in Biological Systems
Source: Nutrients. 2013 May 21;5(5):1734–56. doi: 10.3390/nu5051734 (PMC3708347; doi:10.3390/nu5051734)
Supplement: Supplementary File 1 — Supplementary Information (PDF, 126 KB) [file nutrients-05-01734-s001.pdf]

# Supplementary Information

## S1. Experimental

### S1.1. Preparation and Electrophoresis of Cell Lysates

A549 human lung cancer cells were grown and treated with selenocompounds for 24 h at the concentrations indicated in Figure 1 and as described in Weekley *et al.* [1]. At the end of the treatment, cells were rinsed with ice-cold PBS ( $3 \times 5$  mL) and lysed in ice-cold lysis buffer ( $\sim 1$  mL/ $10^7$  cells). All solutions described herein were prepared using MilliQ water and Teflon tweezers were used to manipulate materials to minimise metal contamination.

Samples intended for separation by SDS-PAGE were lysed at 4 °C in a SDS lysis buffer (2% w/v SDS; 1 mM sodium orthovanadate; 10 mM EDTA; 20 mM Tris; 0.9% NaCl, pH 7.4; 1 mM protease inhibitor cocktail (P8340, Sigma Aldrich, Castle Hill, Australia)), added fresh with constant agitation for 30 min and the supernatant was collected by microcentrifugation. Samples intended for native-PAGE and minimally-disruptive SDS-PAGE were lysed in a native lysis buffer (62.5 mM Tris, pH 6.8; 1 mM PMSF, added fresh) by three freeze-thaw cycles in liquid nitrogen and hot water and the supernatant was collected by microcentrifugation at 4 °C. Protein concentrations were determined by the bichinchoninic acid assay using a commercial kit (Sigma, Castle Hill, Australia). Samples were stored at 203 K.

Cell lysates were diluted in Tris-HCl loading buffer (final buffer concentrations approximately 31 mM Tris, pH 6.8; 12.5% glycerol; 0.05% bromophenol blue; 1% SDS; 100 mM DDT, added fresh) and applied, next to a lane of molecular weight marker (Precision Plus Protein Dual Xtra protein standard, Bio-Rad), to two 4%–20% gradient Bio-Rad mini-PROTEAN TGX gels prepared in parallel such that approximately 20–30 µg of protein was loaded in each well. SDS-PAGE samples were heated at 100 °C for 3 min before loading and were subjected to electrophoresis at 120 V for 1 h in Tris-glycine running buffer (25 mM Tris; 192 mM glycine; 0.1% SDS, pH 8.3). Gels were blotted onto a PVDF membrane (Immun-Blot, Bio-Rad) using a wet transfer system with Tris-glycine running buffer (25 mM Tris, 192 mM glycine, 20% methanol) at 100 V for 1 h.

Minimally disruptive SDS-PAGE and native-PAGE samples were applied to gels as described for SDS-PAGE samples, but without prior heating and in native loading buffer (lacking the SDS and DTT of the SDS loading buffer described above). Minimally-disruptive SDS-PAGE samples were subjected to electrophoresis at 100 V for 1 h in Tris-glycine running buffer (25 mM Tris; 192 mM glycine; 0.1% SDS, pH 8.3). Native PAGE samples were subjected to electrophoresis at 100 V for 80 min in native Tris-glycine running buffer (25 mM Tris; 192 mM glycine, pH 8.3). Minimally disruptive SDS-PAGE and native-PAGE gels were blotted onto a PVDF membrane as described for SDS-PAGE, but methanol was not present in the blotting buffer.

One membrane from each pair of gels run in parallel was stained with Ponceau S solution while the other was left unstained for XFM.

### S1.2. X-ray Fluorescence Microscopy

Imaging was performed at beamline 8-BM-B at the Advanced Photon Source, Lemont, IL, USA. The X-ray beam was tuned to 12.8 keV and passed through a pinhole (spot size on sample, 0.5 mm).

Full X-ray spectra were collected by a four-element silicon drift detector (Vortex, SII Nanotechnology) every 0.5 mm step over a 2 s dwell time. Spectra were fitted and images were processed using MAPS software [2].

**Figure S1.** Photograph (top right) and XFM elemental distribution maps of S, Se and an overlay of S and Se in a minimally disruptive SDS-PAGE blot of the lysates of cells treated with selenocompounds for 24 h. The wells contain lysates of cells treated with (a) 5  $\mu$ M selenite, (b) PBS alone (control), (c) 50  $\mu$ M MeSeCys, (d) 50  $\mu$ M SeMet, (e) 1  $\mu$ M selenite or (f) 100  $\mu$ M SeMet. The colour scheme indicates the relative concentration within each elemental map.

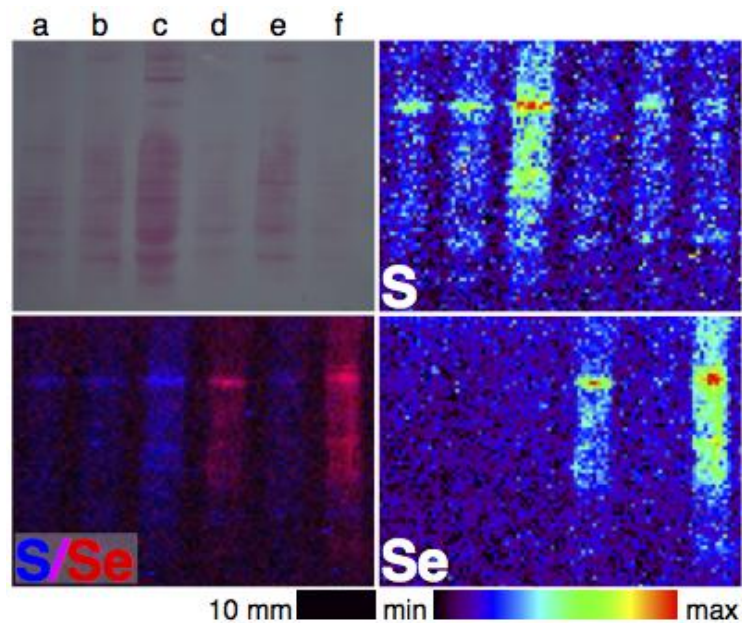

**Figure S2.** Photograph (top right) and XFM elemental distribution maps of S, Se and an overlay of S and Se in a native-PAGE blot of the lysates of cells treated with selenocompounds for 24 h. The wells contain lysates of cells treated with (a) 5  $\mu$ M selenite, (b) PBS alone (control), (c) 50  $\mu$ M MeSeCys, (d) 50  $\mu$ M SeMet, (e) 1  $\mu$ M selenite or (f) 100  $\mu$ M SeMet. The colour scheme indicates the relative concentration within each elemental map.

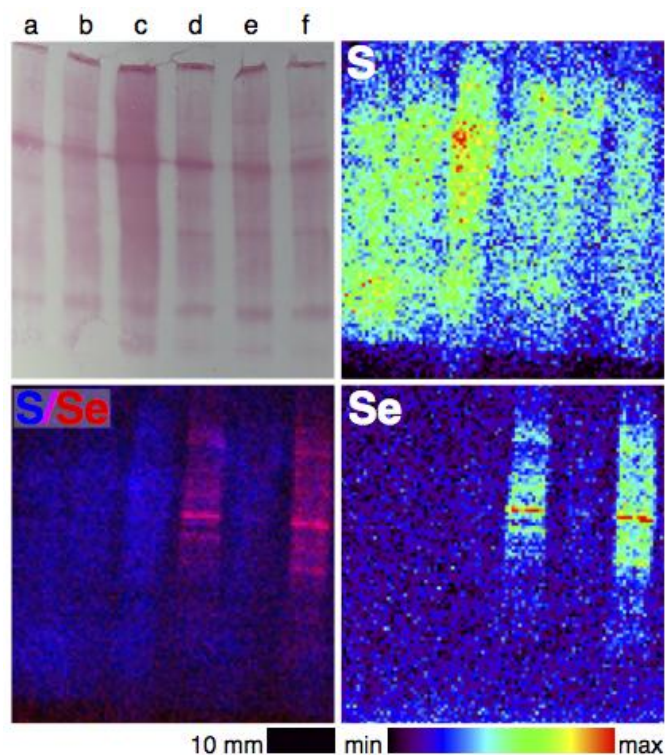

## References

1. Weekley, C.M.; Aitken, J.B.; Vogt, S.; Finney, L.A.; Paterson, D.J.; de Jonge, M.D.; Howard, D.L.; Musgrave, I.F.; Harris, H.H. Uptake, distribution, and speciation of selenoamino acids by human cancer cells: X-ray absorption and fluorescence methods. *Biochemistry* **2011**, *50*, 1641–1650.
2. Vogt, S. MAPS: A set of software tools for analysis and visualization of 3D X-ray fluorescence data sets. *J. Phys. IV* **2003**, *104*, 635–638.

© 2013 by the authors; licensee MDPI, Basel, Switzerland. This article is an open access article distributed under the terms and conditions of the Creative Commons Attribution license (<http://creativecommons.org/licenses/by/3.0/>).
